# Supplementary material for: Regulation of Chemerin and CMKLR1 Expression by Nutritional Status, Postnatal Development, and Gender
Source: MDPI journal article supplement (doi:10.3390/ijms19102905), 2018-09-25
Supplement: s1 [file s1]

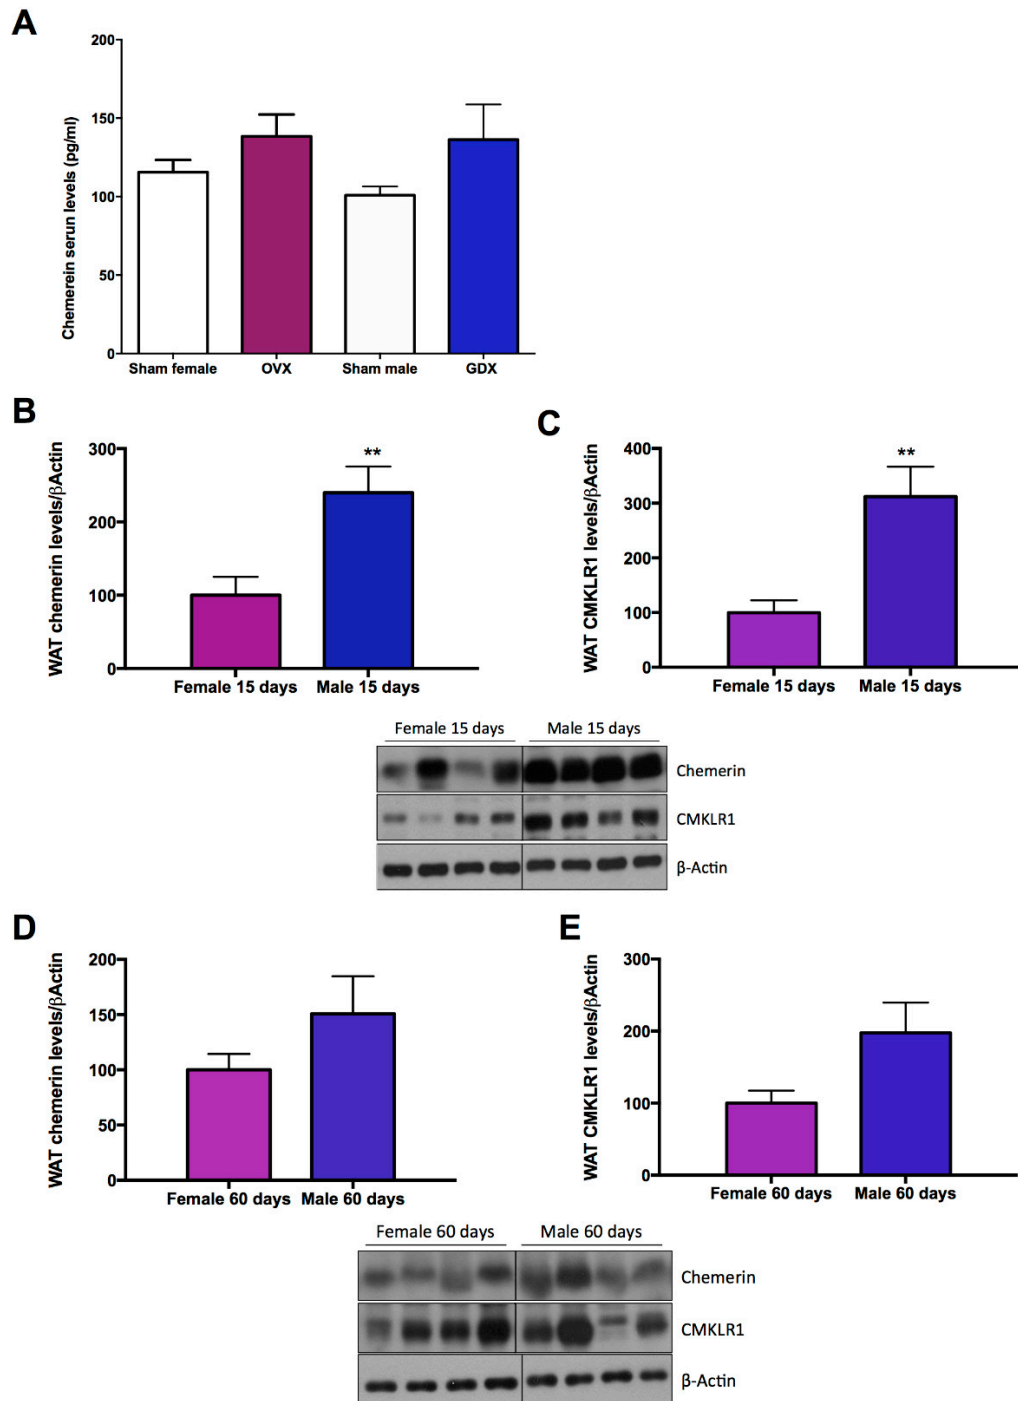

**Figure S1.** (A) Circulating chemerin levels measure by ELISA in males and females control (Sham) and two weeks after orchidectomy (OVX, GDX). (B,C) Quantification of immunoblot analysis and representative immunoblot (lower panel) of chemerin and CMKLR1 at 15 days old in female and male rats. (D,E) Quantification of immunoblot analysis and representative immunoblot (lower panel) of chemerin and CMKLR1 at 60 days old in female and male rats. Expression of indicated proteins was normalized to  $\beta$ -actin to the control. Data are expressed as mean  $\pm$  SEM ( $n = 7-8$  animals per group). \*\* $p < 0.01$ ; male vs. female.
